# Supplementary material for: Body composition and chemotherapy toxicity in women with early breast cancer (CANDO-3): protocol for an observational cohort study
Source: PubMed Central journal article supplement — BMJ Open. 2022 Feb 22;12(2):e054412. doi: 10.1136/bmjopen-2021-054412 (PMC8867326; doi:10.1136/bmjopen-2021-054412), 2022-02-22
Supplement: bmjopen-2021-054412.reviewer_comments.pdf [file bmjopen-2021-054412.reviewer_comments.pdf]

## PEER REVIEW HISTORY

BMJ Open publishes all reviews undertaken for accepted manuscripts. Reviewers are asked to complete a checklist review form (<http://bmjopen.bmj.com/site/about/resources/checklist.pdf>) and are provided with free text boxes to elaborate on their assessment. These free text comments are reproduced below.

### ARTICLE DETAILS

|                            |                                                                                                                                                   |
|----------------------------|---------------------------------------------------------------------------------------------------------------------------------------------------|
| <b>TITLE (PROVISIONAL)</b> | Body composition and chemotherapy toxicity in women with early breast cancer (CANDO-3): Protocol for an observational cohort study                |
| <b>AUTHORS</b>             | Durkin, Kesta; Heetun, Adam; Ewings, Sean; Munday, Richard; Wootton, Stephen; Turner, Lesley; Copson, Ellen; CANDO-3, Steering Group; Cutress, RI |

### VERSION 1 – REVIEW

|                        |             |
|------------------------|-------------|
| <b>REVIEWER</b>        | Ye Won Jeon |
| <b>REVIEW RETURNED</b> | 04-Aug-2021 |

|                         |                                                                                                                                                                                                                                                                                                                                                                                                    |
|-------------------------|----------------------------------------------------------------------------------------------------------------------------------------------------------------------------------------------------------------------------------------------------------------------------------------------------------------------------------------------------------------------------------------------------|
| <b>GENERAL COMMENTS</b> | The relationship between Body composition and Breast cancer (incidence, treatment related toxicity, and outcomes) is an emerging topic in breast cancer research. This study protocol is suitable for the research that explores the relationships between body composition measured through segmental bioelectrical impedance analysis (sBIA; using the Seca mBCA 515) and chemotherapy toxicity. |
|-------------------------|----------------------------------------------------------------------------------------------------------------------------------------------------------------------------------------------------------------------------------------------------------------------------------------------------------------------------------------------------------------------------------------------------|

|                        |                                                           |
|------------------------|-----------------------------------------------------------|
| <b>REVIEWER</b>        | Brenda Cartmel<br>Yale University School of Public Health |
| <b>REVIEW RETURNED</b> | 11-Aug-2021                                               |

|                         |                                                                 |
|-------------------------|-----------------------------------------------------------------|
| <b>GENERAL COMMENTS</b> | This is a very well written protocol paper. I have no comments. |
|-------------------------|-----------------------------------------------------------------|
